# Supplementary material for: Fecal pollution can explain antibiotic resistance gene abundances in anthropogenically impacted environments
Source: PubMed Central journal article supplement (PMC6325112; doi:10.1038/s41467-018-07992-3), 2019-01-08
Supplement: 41467_2018_7992_MOESM3_ESM.pdf [file 41467_2018_7992_MOESM3_ESM.pdf]

## **Description of Additional Supplementary Files**

File Name: Supplementary Data 1  
Description: Data accession codes.

File Name: Supplementary Data 2  
Description: Result file.

File Name: Supplementary Data 3  
Description:  $\phi$ B124-14 detection.

File Name: Supplementary Data 4  
Description: ARG count tables.
